# Supplementary material for: Chick Early Amniotic Fluid (ceAF) Deters Tumorigenesis via Cell Cycle Arrest and Apoptosis
Source: MDPI journal article supplement (doi:10.3390/biology11111577), 2022-10-27
Supplement: s1 [file s1]

### BCap37 Western Blotting

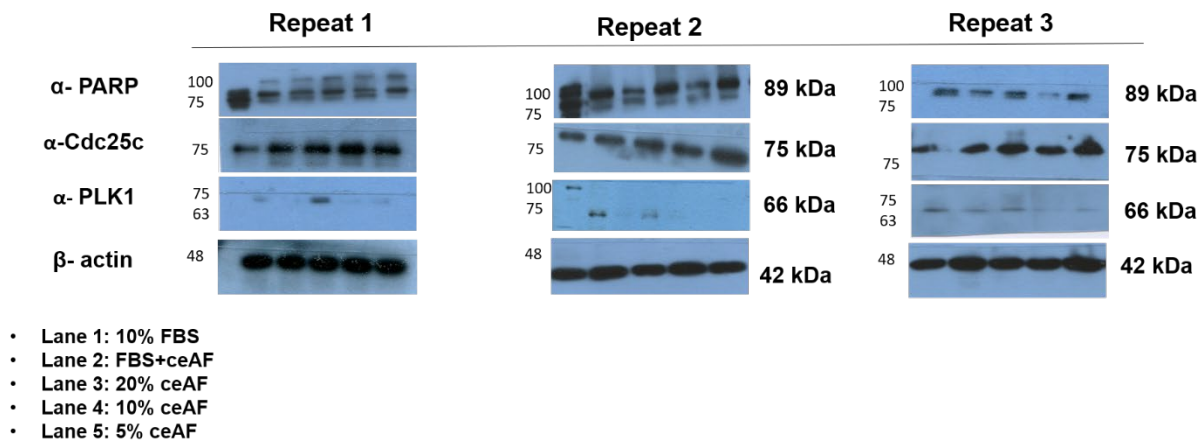

Figure S1: BCap37 Western Blotting.

### MCF-7 Western Blotting

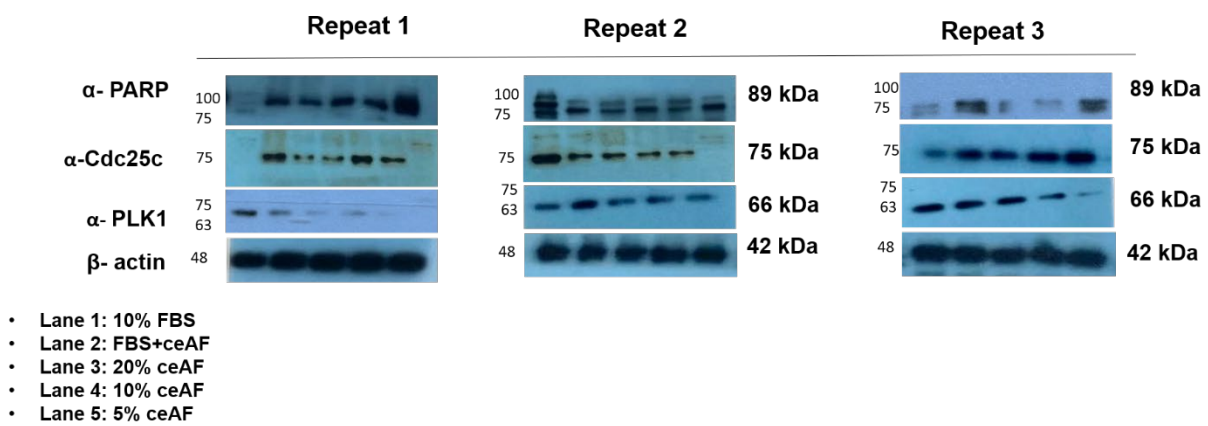

Figure S2: MCF-7 Western Blotting.

### RKO Western Blotting

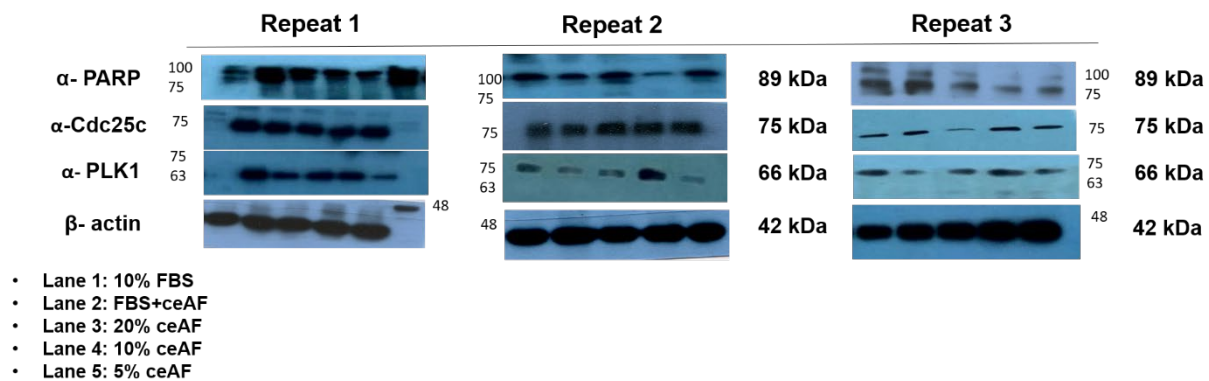

Figure S3: RKO Western Blotting.
